# Supplementary material for: Systematically dissecting the global mechanism of miRNA functions in mouse pluripotent stem cells
Source: PubMed Central journal article supplement (PMC4488055; doi:10.1186/s12864-015-1706-y), 2015-07-01
Supplement: 12864_2015_1706_MOESM1_ESM.pdf [file 12864_2015_1706_MOESM1_ESM.pdf]

# **Systematically Dissecting the Global Mechanism of MiRNA functions in Stem Cells**

Anyou Wang ,Yan Zhong, Qianchuan He

## **Supplemental materials**

Figure S1, Functional enrichments of all targets that are targeted by all up- and down-regulated miRNAs. A, Up-regulated miRNAs. B, down-regulated miRNAs.

Figure S2, total 17 out of top 20 important miRNAs target developmental genes.

Figure S3, down-regulated miRNAs mediate metabolism in stem cells.

Figure S4, all pluripotent genes targeted by up-regulated miRNAs (A) and down-regulated miRNAs (B) in stem cells.

Figure S5. An activated network targeted by down-regulated miRNAs.

Figure S6. Down-regulated miRNAs targeting DNMT3A.

Table S1, Data sources

Table S2, a list of miRNAs that are frequently and significantly differential expressed between stem cells and somatic cells.

Table S3, a list of genes coding for proteins that are frequently and significantly differential expressed between stem cells and somatic cells.

Table S4, a list of top 20 important miRNAs

Figure S1

A

Top 10 GO term based on entire annotation

| p-value  | corr p-val | Description                               |
|----------|------------|-------------------------------------------|
| 3.62E-86 | 1.11E-82   | cellular process                          |
| 4.26E-65 | 6.52E-62   | multicellular organismal development      |
| 1.59E-61 | 1.62E-58   | anatomical structure development          |
| 2.27E-61 | 1.74E-58   | developmental process                     |
| 5.6E-61  | 3.42E-58   | system development                        |
| 8.15E-53 | 4.15E-50   | anatomical structure morphogenesis        |
| 2.18E-48 | 9.55E-46   | biological regulation                     |
| 1.15E-47 | 4.38E-45   | regulation of biological process          |
| 9.41E-47 | 3.2E-44    | organ development                         |
| 6.01E-44 | 1.84E-41   | positive regulation of biological process |

Top 10 GO term using reference of a set of genes altered expression

| p-value  | corr p-val | Description                                              |
|----------|------------|----------------------------------------------------------|
| 1.43E-08 | 2.10E-05   | anatomical structure morphogenesis                       |
| 1.08E-07 | 7.95E-05   | organ development                                        |
| 2.95E-07 | 1.45E-04   | developmental process                                    |
| 5.06E-07 | 1.87E-04   | anatomical structure development                         |
| 6.41E-07 | 1.89E-04   | multicellular organismal development                     |
| 1.57E-06 | 3.85E-04   | system development                                       |
| 3.54E-06 | 7.45E-04   | anatomical structure formation involved in morphogenesis |
| 1.36E-05 | 2.50E-03   | multicellular organismal process                         |
| 1.95E-05 | 3.20E-03   | cell development                                         |
| 3.33E-05 | 4.91E-03   | striated muscle tissue development                       |

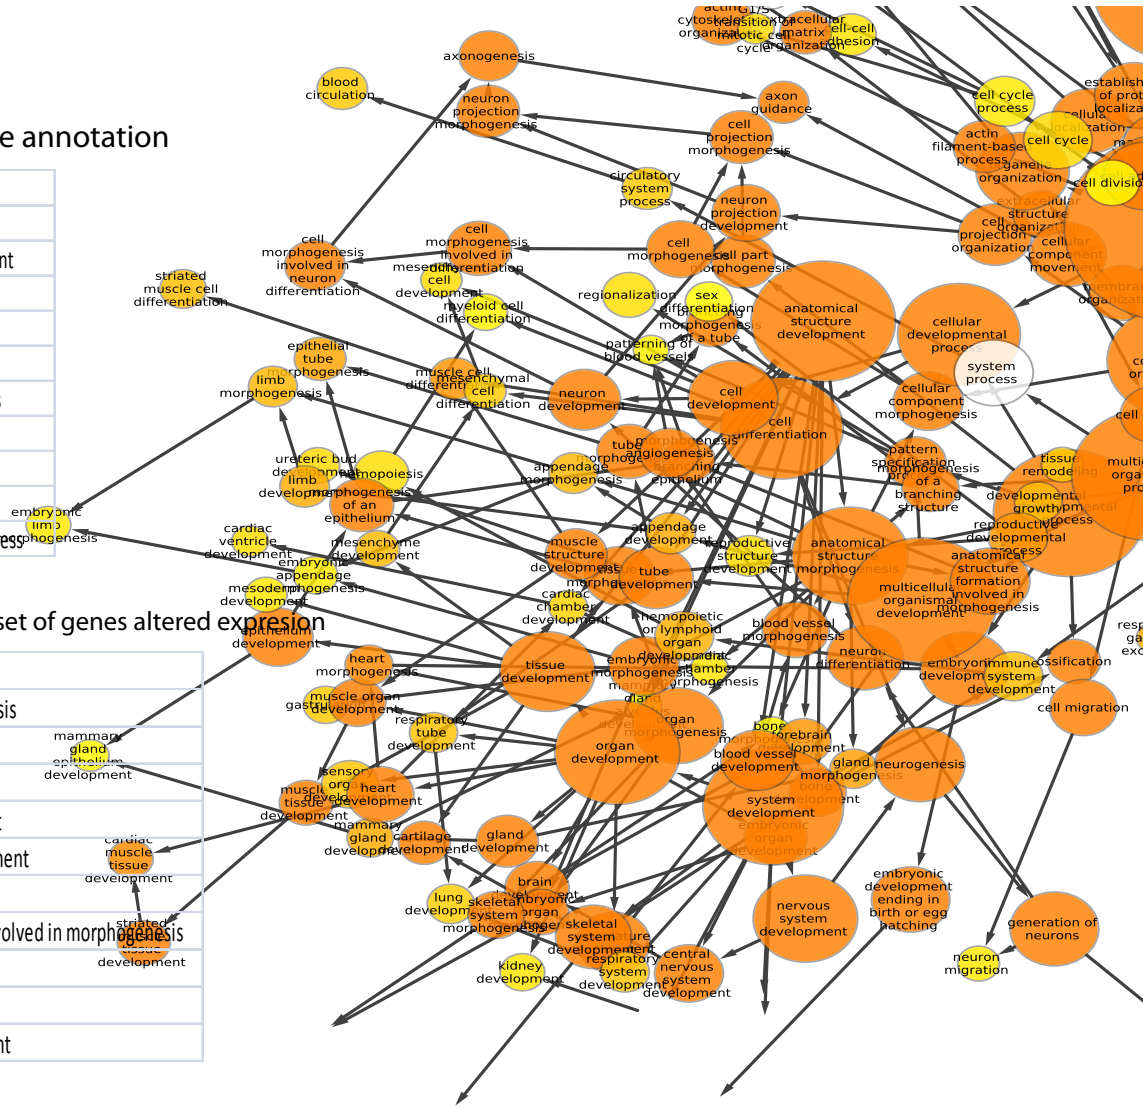

B

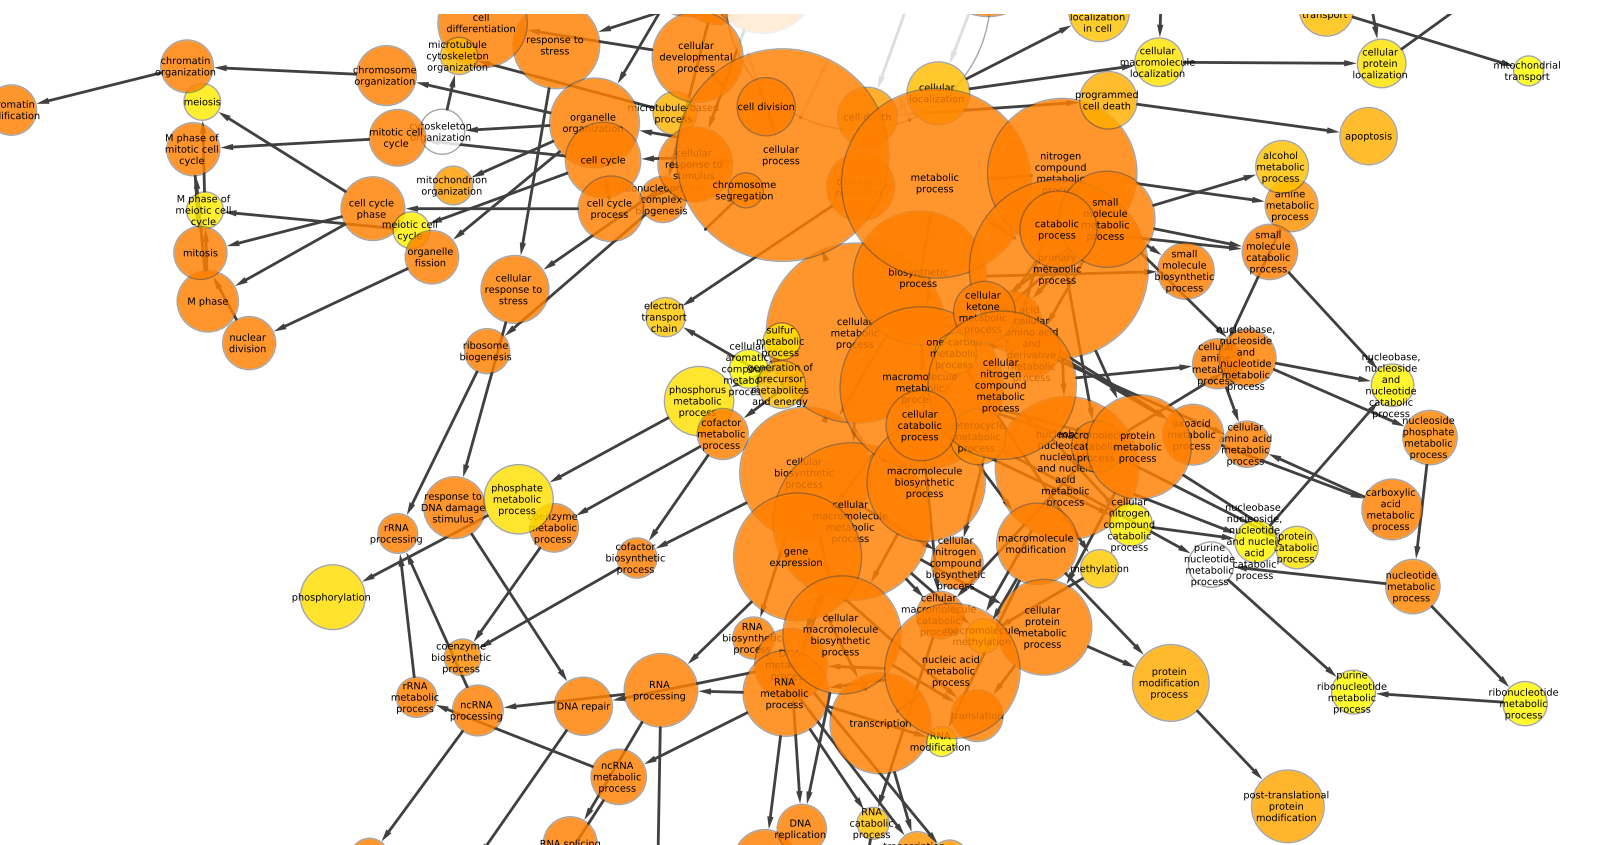

Total 17 out of top 20 miRNAs target developmental genes

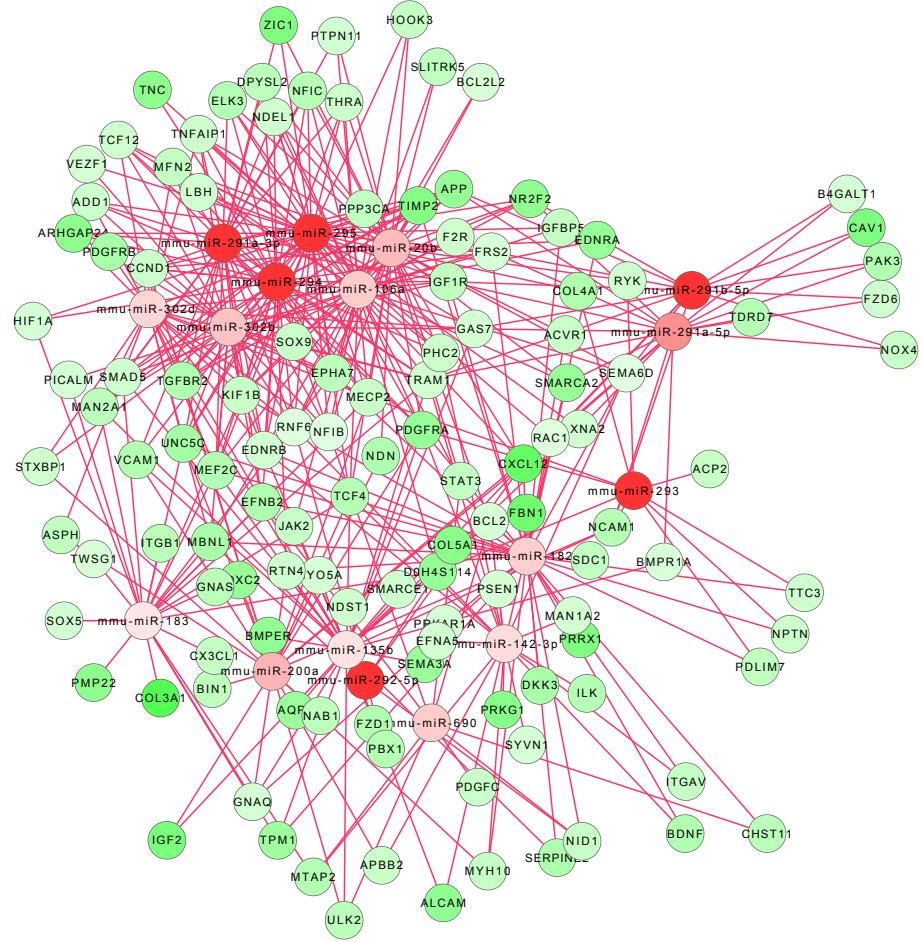

# Down-regulated miRNAs mediate metabolism and pluripotency

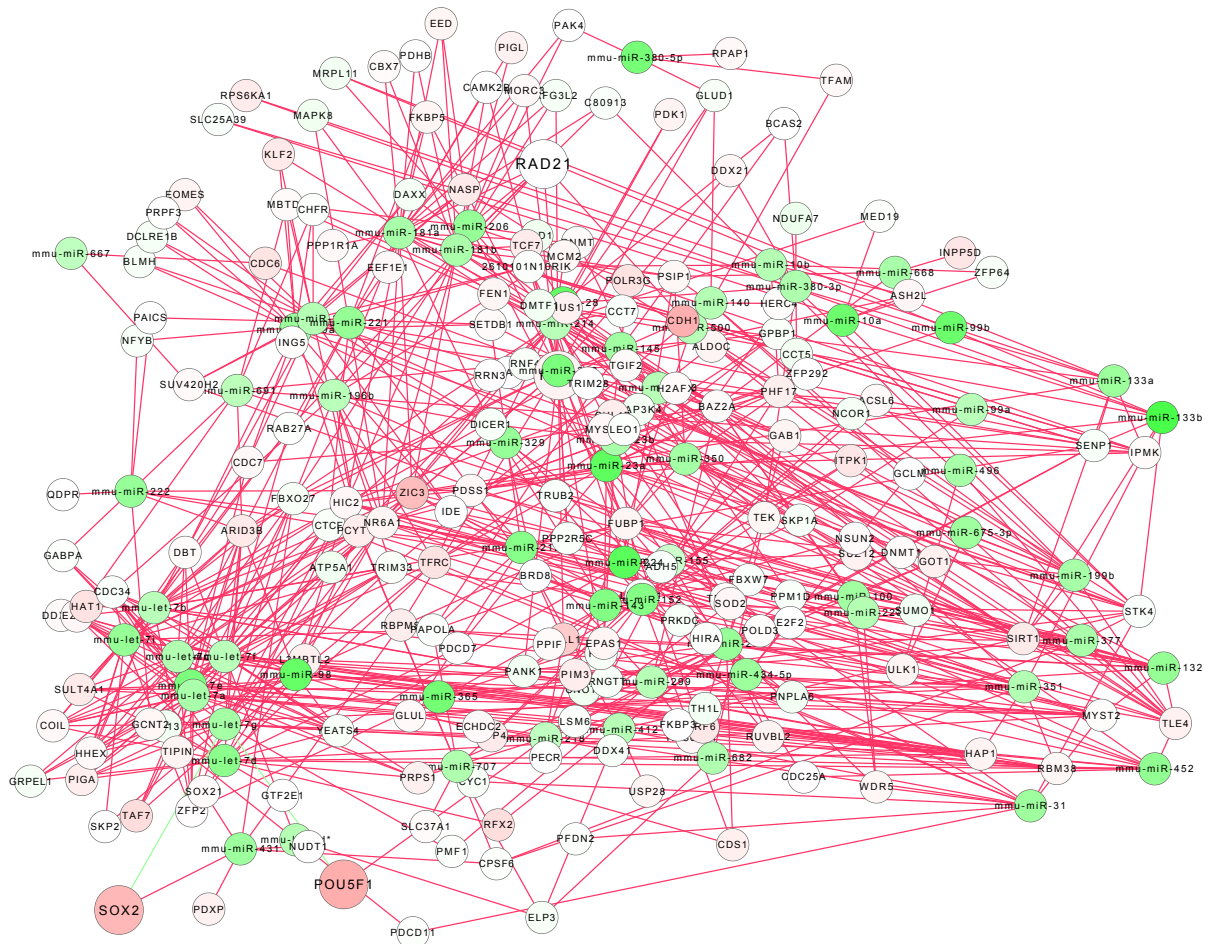





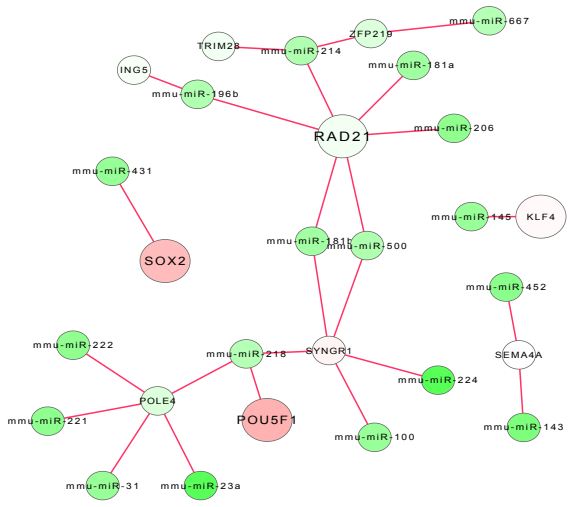



Table S1 data resources

| GEO number | Platform          | measurement                                 |
|------------|-------------------|---------------------------------------------|
| GSE25310   | CLIP-seq          | ES miRNA targets                            |
| GSE11724   | ChIP-seq          | TF binding                                  |
| GSE11431   | ChIP-seq          | TF binding                                  |
| GSM278905  | RRBS              | ES DNA methylation                          |
| GSM278902  | RRBS              | TKO methylation                             |
| GSM539867  | RNA-Seq           | mouse embryonic fibroblast cells [09-002]   |
| GSM539866  | RNA-Seq           | mouse embryonic stem cells [09-002]         |
| GSE30012   | Mouse430_2 array  | ES miRNA expression                         |
| GSE25310   | GPL11410          | micrRNA and mRNA expression                 |
| GSM231739  | Agilent-GPL2872   | ES gene expression TKO/WT                   |
| GSE15267   | AffymetrixGPL1261 | Gene expression somatic cells vs stem cells |
| GSE14012   | AffymetrixGPL1261 | Gene expression somatic cells vs stem cells |
| GSE10871   | AffymetrixGPL1261 | Gene expression somatic cells vs stem cells |
| GSE14790   | AffymetrixGPL1261 | Gene expression somatic cells vs stem cells |
| GSE16062   | IlluminaGPL6885   | Gene expression somatic cells vs stem cells |



Table S2 miRNAs differentially expressed between stem cell vs somatic cells with high frequency >25% of observations

| geneID          | foldChange.StemcellvsSomaticCells |
|-----------------|-----------------------------------|
| mmu-miR-291a-3p | 23.38772103                       |
| mmu-miR-292-5p  | 20.9773225                        |
| mmu-miR-295     | 18.61514609                       |
| mmu-miR-290     | 16.83638073                       |
| mmu-miR-291b-5p | 16.74397919                       |
| mmu-miR-294     | 16.33979504                       |
| mmu-miR-293     | 15.71944751                       |
| mmu-miR-291a-5p | 10.70302558                       |
| mmu-miR-291b-3p | 8.775662583                       |
| mmu-miR-205     | 8.656636965                       |
| mmu-miR-292-3p  | 7.513040922                       |
| mmu-miR-200a    | 7.476828136                       |
| mmu-miR-20b     | 7.113430578                       |
| mmu-miR-429     | 6.970376253                       |
| mmu-miR-93      | 6.320621674                       |
| mmu-miR-302b    | 6.319533201                       |
| mmu-miR-124a    | 6.210366092                       |
| mmu-miR-141     | 6.112532011                       |
| mmu-miR-32      | 5.892597823                       |
| mmu-miR-25      | 5.664093286                       |
| mmu-miR-106a    | 5.660199796                       |
| mmu-miR-96      | 5.576097803                       |
| mmu-miR-690     | 5.566673137                       |
| mmu-miR-210     | 5.494180249                       |
| mmu-miR-182     | 5.380304319                       |
| mmu-miR-339     | 5.178218031                       |
| mmu-miR-33      | 5.150748639                       |
| mmu-miR-19b     | 5.130661066                       |
| mmu-miR-302d    | 4.786597786                       |
| mmu-miR-195     | 4.773097795                       |
| mmu-miR-297b    | 4.742119218                       |
| mmu-miR-499     | 4.699375408                       |
| mmu-miR-106b    | 4.67924418                        |
| mmu-miR-712*    | 4.616388282                       |
| mmu-miR-101b    | 4.615452785                       |
| mmu-miR-706     | 4.577798951                       |
| mmu-miR-672     | 4.425689091                       |
| mmu-miR-20a     | 4.355849211                       |
| mmu-miR-302     | 4.187271105                       |
| mmu-miR-142-3p  | 4.185529766                       |
| mmu-miR-19a     | 4.154314537                       |
| mmu-miR-450b    | 4.143615059                       |
| mmu-miR-200c    | 4.139625599                       |
| mmu-miR-17-5p   | 4.015734124                       |

|                |              |
|----------------|--------------|
| mmu-miR-669b   | 4.005643461  |
| mmu-miR-363    | 4.004376577  |
| mmu-miR-130b   | 3.921190227  |
| mmu-miR-142-5p | 3.771559152  |
| mmu-miR-708    | 3.757978939  |
| mmu-miR-301b   | 3.671137996  |
| mmu-miR-297    | 3.649760196  |
| mmu-miR-711    | 3.642487186  |
| mmu-miR-135b   | 3.61287415   |
| mmu-miR-145    | -3.689012325 |
| mmu-miR-125b   | -3.750522829 |
| mmu-miR-675-3p | -3.775797104 |
| mmu-miR-31     | -3.789955248 |
| mmu-miR-431    | -3.827836369 |
| mmu-miR-133a   | -3.931634792 |
| mmu-miR-434-5p | -3.95970537  |
| mmu-miR-29a    | -4.128390595 |
| mmu-miR-125a   | -4.168574915 |
| mmu-miR-27b    | -4.181204463 |
| mmu-miR-206    | -4.1991836   |
| mmu-miR-222    | -4.206742949 |
| mmu-miR-329    | -4.226853284 |
| mmu-let-7i     | -4.253606445 |
| mmu-miR-221    | -4.277690509 |
| mmu-miR-132    | -4.327457901 |
| mmu-miR-345    | -4.362726416 |
| mmu-miR-452    | -4.493999108 |
| mmu-let-7d     | -4.733310501 |
| mmu-miR-181a*  | -4.890038681 |
| mmu-miR-212    | -5.03014549  |
| mmu-miR-152    | -5.091913825 |
| mmu-miR-143    | -5.251965264 |
| mmu-miR-433-5p | -5.353386842 |
| mmu-let-7e     | -5.627257306 |
| mmu-miR-322    | -5.627467759 |
| mmu-miR-380-5p | -5.840198038 |
| mmu-miR-666    | -5.963478682 |
| mmu-miR-365    | -6.053925857 |
| mmu-miR-10a    | -6.463178387 |
| mmu-miR-24*    | -6.501407687 |
| mmu-miR-99b    | -6.54057846  |
| mmu-miR-98     | -6.824098585 |
| mmu-miR-28     | -6.985496746 |
| mmu-miR-23a    | -7.258185943 |
| mmu-miR-675-5p | -7.319121705 |
| mmu-miR-224    | -7.383165325 |
| mmu-miR-133b   | -8.331863729 |

mmu-miR-155

-12.36089174

Table S3. Genes differentially expressed between stem cells  
and somatic cells with high frequency >50% of observations

| GB_ACC    | ENTREZ_GI | Gene.Symbol | logFoldChange.ESvsSC |
|-----------|-----------|-------------|----------------------|
| BC006640  | 20315     | Cxcl12      | -7.932773867         |
| BF225802  | 16011     | Igfbp5      | -7.7652649           |
| AW550625  | 12825     | Col3a1      | -7.7405454           |
| BF227507  | 12843     | Col1a2      | -7.50996995          |
| BB542051  | 18295     | Ogn         | -7.13772715          |
| U08020    | 12842     | Col1a1      | -7.025342217         |
| NM_013655 | 20315     | Cxcl12      | -6.8464668           |
| NM_011581 | 21826     | Thbs2       | -6.743730283         |
| AV229424  | 12832     | Col5a2      | -6.6650371           |
| BB051738  | 18933     | Prrx1       | -6.523803517         |
| M65143    | 16948     | Lox         | -6.263793183         |
| AF007248  | 14118     | Fbn1        | -6.234405867         |
| NM_009933 | 12833     | Col6a1      | -6.142877467         |
| NM_007993 | 14118     | Fbn1        | -6.087729233         |
| BC019502  | 12111     | Bgn         | -6.042548083         |
| AB015978  | 18414     | Osmr        | -6.018220117         |
| BE197945  | 20324     | Sdpr        | -5.902171217         |
| NM_007729 | 12814     | Col11a1     | -5.888984717         |
| AW049660  | 18032     | Nfix        | -5.878165733         |
| NM_010514 | 16002     | Igf2        | -5.805814817         |
| BB197591  | 54216     | Pcdh7       | -5.793524283         |
| AV226618  | 13837     | Epha3       | -5.703367667         |
| AF378762  | 69538     | Antxr1      | -5.671588117         |
| M68513    | 13837     | Epha3       | -5.646988233         |
| BC002064  | 19242     | Ptn         | -5.631718783         |
| NM_011340 | 20317     | Serpinf1    | -5.561155483         |
| BB795075  | 18214     | Ddr2        | -5.5521091           |
| BC023060  | 216616    | Efemp1      | -5.541377517         |
| BF144658  | 21808     | Tgfb2       | -5.516599417         |
| BB250384  | 22329     | Vcam1       | -5.511377133         |
| AB029929  | 12389     | Cav1        | -5.478985417         |
| D67076    | 11504     | Adamts1     | -5.469247617         |
| BB315728  | 18032     | Nfix        | -5.460392167         |
| BI794771  | 12842     | Col1a1      | -5.456734267         |
| L06502    | 18933     | Prrx1       | -5.448142767         |
| BG793483  | 21813     | Tgfbr2      | -5.434682533         |
| BB532202  | 14264     | Fmod        | -5.394454433         |
| BB361162  | 22771     | Zic1        | -5.383117233         |
| AI931862  | 12111     | Bgn         | -5.378983617         |
| BC014690  | 21809     | Tgfb3       | -5.302384367         |
| NM_018865 | 22402     | Wisp1       | -5.29682725          |
| AV064339  | 20324     | Sdpr        | -5.2953667           |
| BG067986  | 54216     | Pcdh7       | -5.295023283         |
| NM_030888 | 81799     | C1qtnf3     | -5.279631533         |

|           |                 |              |
|-----------|-----------------|--------------|
| BB233297  | 21826 Thbs2     | -5.26170495  |
| BF168458  | 21858 Timp2     | -5.239630733 |
| BB259670  | 14362 Fzd1      | -5.23704885  |
| AA499047  | 18596 Pdgfrb    | -5.226616983 |
| BC026446  | 219151 Scara3   | -5.1983228   |
| NM_010714 | 16876 Lhx9      | -5.18046395  |
| NM_133859 | 99543 Olfml3    | -5.167943083 |
| BB067079  | 22418 Wnt5a     | -5.160633383 |
| AW555664  | 399558 Flrt2    | -5.14692565  |
| BC021484  | 16651 Sspn      | -5.141520367 |
| BC011063  | 15402 Hoxa5     | -5.109899467 |
| M93954    | 21858 Timp2     | -5.0922978   |
| AV310588  | 12444 Ccnd2     | -5.076240083 |
| NM_013589 | 16997 Ltbp2     | -5.07117345  |
| BB791906  | 14178 Fgf7      | -5.0607749   |
| BQ175880  | 12444 Ccnd2     | -5.031714083 |
| NM_009829 | 12444 Ccnd2     | -5.03108855  |
| BC022107  | 12558 Cdh2      | -5.030543317 |
| NM_011160 | 19091 Prkg1     | -5.010924967 |
| AK007904  | 12444 Ccnd2     | -5.010597567 |
| BB114398  | 12816 Col12a1   | -5.001727783 |
| BB377340  | 13612 Edil3     | -4.984431667 |
| BI455189  | 12834 Col6a2    | -4.981937467 |
| BC018425  | 22418 Wnt5a     | -4.949481167 |
| AF309564  | 80837 Rhoj      | -4.942552217 |
| AW744319  | 12831 Col5a1    | -4.912884333 |
| NM_010284 | 14600 Ghr       | -4.907539267 |
| AK003674  | 68588 Cthrc1    | -4.9040982   |
| NM_009610 | 11468 Actg2     | -4.88703015  |
| BM220945  | 239217 Kctd12   | -4.885967567 |
| BB658835  | 23794 Adamts5   | -4.884421383 |
| BC019836  | 16010 Igfbp4    | -4.86110935  |
| NM_018764 | 54216 Pcdh7     | -4.826503217 |
| AA500897  | 26362 Axl       | -4.824049367 |
| AV222756  | 259300 Ehd2     | -4.811690783 |
| NM_018884 | 55983 Pdzrn3    | -4.770790783 |
| BB759833  | 17300 Foxc1     | -4.766068317 |
| BQ177170  | 17112 Tm4sf1    | -4.749287983 |
| BM250666  | 12830 Col4a5    | -4.738634083 |
| BC025502  | 231532 Arhgap24 | -4.7154329   |
| NM_007392 | 11475 Acta2     | -4.71167825  |
| NM_008885 | 18858 Pmp22     | -4.71162355  |
| AV246911  | 12831 Col5a1    | -4.70608125  |
| NM_133918 | 100952 Emilin1  | -4.685038    |
| AV260198  | 83675 Bicc1     | -4.676352617 |
| BC021376  | 225207 Zfp521   | -4.6747989   |
| NM_011607 | 21923 Tnc       | -4.6736706   |

|           |                    |              |
|-----------|--------------------|--------------|
| NM_007833 | 13179 Dcn          | -4.668888083 |
| AF357006  | 16949 Loxl1        | -4.661639267 |
| BC011507  | 74480 Samd4        | -4.6606821   |
| BB493031  | 23888 Gpc6         | -4.659793267 |
| BI249259  | 18032 Nfix         | -4.659746767 |
| NM_054044 | 78560 Gpr124       | -4.652361    |
| BC001999  | 13732 Emp3         | -4.648468717 |
| BB041180  | 16876 Lhx9         | -4.631340583 |
| BI690209  | 57342 Parva        | -4.603038383 |
| AK018128  | 70717 6330406l15Ri | -4.599817333 |
| AI595932  | 17260 Mef2c        | -4.571089667 |
| AI463873  | 11819 Nr2f2        | -4.558937633 |
| BG075699  | 399558 Flrt2       | -4.550595967 |
| AV149705  | 108927 Lhfp        | -4.537199083 |
| AK014221  | 73230 Bmper        | -4.536276183 |
| BB468025  | 54381 Pgcg         | -4.535907333 |
| BB363812  | 14051 Eya4         | -4.52926855  |
| AK020118  | 23888 Gpc6         | -4.5247486   |
| BM217996  | 83675 Bicc1        | -4.521218667 |
| NM_009636 | 11568 Aebp1        | -4.509546617 |
| AA987181  | 15405 Hoxa9        | -4.496607467 |
| NM_011766 | 22762 Zfpm2        | -4.496262983 |
| AV315205  | 11658 Alcam        | -4.495887367 |
| U95030    | 11658 Alcam        | -4.4742135   |
| BF147716  | 17390 Mmp2         | -4.463715417 |
| NM_008608 | 17387 Mmp14        | -4.4584154   |
| AV332957  | 20429 Shox2        | -4.44107     |
| AK008112  | 18933 Prrx1        | -4.429082483 |
| BB787243  | 16010 Igfbp4       | -4.408829283 |
| M27130    | 12505 Cd44         | -4.408205433 |
| NM_023118 | 13132 Dab2         | -4.401669267 |
| BB817332  | 399558 Flrt2       | -4.401003567 |
| D63423    | 11747 Anxa5        | -4.3868292   |
| BC014870  | 235587 Parp3       | -4.368841483 |
| U03425    | 13649 Egfr         | -4.353990467 |
| NM_011150 | 19039 Lgals3bp     | -4.34716645  |
| BB229377  | 13717 Eln          | -4.3469066   |
| BF681826  | 26360 Angptl2      | -4.34243245  |
| AV369812  | 13649 Egfr         | -4.340586717 |
| AI385532  | 21825 Thbs1        | -4.3388455   |
| AK012411  | 20317 Serpinf1     | -4.334218667 |
| NM_016900 | 12390 Cav2         | -4.327267733 |
| NM_007471 | 11820 App          | -4.32309575  |
| BC026153  | 13841 Epha7        | -4.322886683 |
| BE652876  | 60527 Fads3        | -4.31762715  |
| NM_022563 | 18214 Ddr2         | -4.317137833 |
| BC005490  | 11820 App          | -4.311839833 |



|           |                 |              |
|-----------|-----------------|--------------|
| AY083458  | 235505 Cd109    | -4.310650267 |
| AW146109  | 12505 Cd44      | -4.309742383 |
| AF022889  | 268977 Ltbp1    | -4.293317933 |
| BF780807  | 23972 Papss2    | -4.2837158   |
| NM_010222 | 14231 Fkbp7     | -4.283483917 |
| BB765827  | 74761 Mxra8     | -4.28266945  |
| BB369191  | 27528 DOH4S114  | -4.258134683 |
| NM_011658 | 22160 Twist1    | -4.252172233 |
| BC022679  | 52552 Parp8     | -4.249244683 |
| BC024375  | 14600 Ghr       | -4.235411317 |
| AW558570  | 13617 Ednra     | -4.235029783 |
| NM_010151 | 13865 Nr2f1     | -4.23266835  |
| BB053506  | 207181 Rbms3    | -4.227119367 |
| BB464523  | 12293 Cacna2d1  | -4.2176231   |
| AI325255  | 14230 Fkbp10    | -4.2139772   |
| NM_009365 | 21804 Tgfb1i1   | -4.2037574   |
| AW537708  | 18595 Pdgfra    | -4.201673433 |
| BG244279  | 26360 Angptl2   | -4.19122825  |
| AV021105  | 208647 Creb3l2  | -4.189322833 |
| NM_021474 | 58859 Efemp2    | -4.172999333 |
| AW558468  | 230103 Npr2     | -4.170204383 |
| BM230959  | 229731 Slc25a24 | -4.15558595  |
| NM_013519 | 14234 Foxc2     | -4.150217817 |
| BG248060  | 12153 Bmp1      | -4.1456309   |
| AK011935  | 67155 Smarca2   | -4.1424534   |
| BC009660  | 109042 Prkcdp   | -4.138494033 |
| NM_010730 | 16952 Anxa1     | -4.137948167 |
| NM_017464 | 18003 Nedd9     | -4.125438817 |
| NM_020606 | 57342 Parva     | -4.117250083 |
| NM_054042 | 70445 Cd248     | -4.1162995   |
| AW107196  | 74480 Samd4     | -4.089650683 |
| NM_008520 | 16998 Ltbp3     | -4.088398567 |
| NM_007400 | 11489 Adam12    | -4.087465183 |
| BB138485  | 70676 Gulp1     | -4.06900915  |
| BB041237  | 17389 Mmp16     | -4.0669223   |
| NM_009152 | 20346 Sema3a    | -4.06663545  |
| AK007400  | 77889 Lbh       | -4.065124233 |
| BC027199  | 233328 Lrrk1    | -4.0638856   |
| BC003726  | 14789 Leprel2   | -4.061919033 |
| BM220576  | 53623 Gria3     | -4.059143167 |
| BM570006  | 20564 Slit3     | -4.050010933 |
| NM_007472 | 11826 Aqp1      | -4.049342233 |
| BB329489  | 12406 Serpinh1  | -4.035949167 |
| BC024358  | 22004 Tpm2      | -4.027799067 |
| BB371406  | 57265 Fzd2      | -4.024201683 |
| BI106777  | 12293 Cacna2d1  | -4.016322467 |
| BB484759  | 224024 Scarf2   | -3.995337517 |

|           |                 |              |
|-----------|-----------------|--------------|
| BC025145  | 19266 Ptprd     | -3.96890555  |
| AK004519  | 56726 Sh3bgrl   | -3.915095233 |
| NM_010221 | 14230 Fkbp10    | -3.911402667 |
| BB114067  | 21345 Tagln     | -3.906768233 |
| NM_010517 | 16010 Igfbp4    | -3.895716167 |
| AV164956  | 22418 Wnt5a     | -3.889125017 |
| U71189    | 13592 Ebf2      | -3.883624733 |
| AF339910  | 18605 Enpp1     | -3.88293505  |
| BQ173967  | 13640 Efna5     | -3.882553467 |
| AV246882  | 235505 Cd109    | -3.87793775  |
| AK003186  | 22004 Tpm2      | -3.875057833 |
| NM_009821 | 12394 Runx1     | -3.8666507   |
| NM_010743 | 17082 Il1rl1    | -3.865813883 |
| BB324823  | 16998 Ltbp3     | -3.86059405  |
| BC025514  | 102644 Oaf      | -3.857056783 |
| NM_007801 | 13036 Ctsh      | -3.85513275  |
| NM_010581 | 16423 Cd47      | -3.854950117 |
| AV238225  | 16905 Lmna      | -3.8510058   |
| AK018679  | 16423 Cd47      | -3.832084267 |
| BG073383  | 15410 Hoxb3     | -3.820933467 |
| NM_026405 | 67844 Rab32     | -3.819808667 |
| BF144687  | 70676 Gulp1     | -3.81964405  |
| NM_019391 | 16985 Lsp1      | -3.81878645  |
| NM_013586 | 16950 Loxl3     | -3.813466317 |
| AI415741  | 94352 Loxl2     | -3.8120326   |
| BI220012  | 12406 Serpinh1  | -3.811311317 |
| NM_007802 | 13038 Ctsk      | -3.804638867 |
| BB832504  | 18028 Nfib      | -3.801083117 |
| BC013463  | 15430 Hoxd10    | -3.784799    |
| M22479    | 22003 Tpm1      | -3.783677167 |
| BG963150  | 20563 Slit2     | -3.783541217 |
| BC013560  | 12827 Col4a2    | -3.774358167 |
| NM_008984 | 19274 Ptprm     | -3.769132717 |
| BB233088  | 21928 Tnfaip2   | -3.7684148   |
| BC008277  | 13617 Ednra     | -3.767968717 |
| BI111620  | 21859 Timp3     | -3.76779495  |
| BB475194  | 23794 Adamts5   | -3.76137165  |
| NM_021355 | 14264 Fmod      | -3.736082733 |
| NM_007585 | 12306 Anxa2     | -3.731015333 |
| BF578055  | 229731 Slc25a24 | -3.725295933 |
| BB547877  | 20563 Slit2     | -3.716729817 |
| NM_016753 | 17035 Lxn       | -3.70538055  |
| AV016275  | 20742 Spnb2     | -3.701173833 |
| NM_008495 | 16852 Lgals1    | -3.6991015   |
| AW551930  | 83675 Bicc1     | -3.698414167 |
| AK018466  | 207181 Rbms3    | -3.68959625  |
| NM_008987 | 19288 Ptx3      | -3.687359367 |

|           |                |              |
|-----------|----------------|--------------|
| AK003819  | 74777 Sepn1    | -3.6822946   |
| AW412729  | 12816 Col12a1  | -3.663389833 |
| BC020152  | 223272 Itgbl1  | -3.657189217 |
| Y07687    | 18028 Nfib     | -3.657044833 |
| NM_011985 | 26561 Mmp23    | -3.644890267 |
| NM_009378 | 21824 Thbd     | -3.6371471   |
| BF451748  | 107589 Mylk    | -3.626035767 |
| BM251152  | 13003 Vcan     | -3.620597833 |
| BB468082  | 18481 Pak3     | -3.6195631   |
| NM_007899 | 13601 Ecm1     | -3.6077534   |
| BB522674  | 20541 Slc8a1   | -3.606644633 |
| NM_019989 | 56726 Sh3bgrl  | -3.60465905  |
| BC023448  | 23888 Gpc6     | -3.603901967 |
| AK002516  | 11857 Arhgdib  | -3.6024453   |
| BF100813  | 13618 Ednrb    | -3.594391017 |
| NM_011777 | 22793 Zyx      | -3.594158817 |
| BB326929  | 58194 Sh3kbp1  | -3.582396833 |
| BB248904  | 56726 Sh3bgrl  | -3.58152235  |
| BB027759  | 231997 Fkbp14  | -3.5728165   |
| AU021035  | 15529 Sdc2     | -3.570693117 |
| AI481026  | 29817 Igfbp7   | -3.56210855  |
| NM_008393 | 16373 Irx3     | -3.560717517 |
| BB526042  | 320452 P4ha3   | -3.5487859   |
| BB100920  | 17118 Marcks   | -3.53907495  |
| BB097480  | 223254 Farp1   | -3.534434933 |
| BI687652  | 18028 Nfib     | -3.524464033 |
| BG868949  | 17122 Mxd4     | -3.514140767 |
| NM_020561 | 57319 Smpdl3a  | -3.51306225  |
| AF059567  | 12579 Cdkn2b   | -3.5073857   |
| NM_009472 | 22253 Unc5c    | -3.505214767 |
| NM_009794 | 12334 Capn2    | -3.498667433 |
| NM_009627 | 11535 Adm      | -3.48734415  |
| BQ175796  | 18481 Pak3     | -3.4733871   |
| BC005569  | 58809 Rnase4   | -3.460646467 |
| BB327018  | 14118 Fbn1     | -3.456580617 |
| NM_010212 | 14200 Fhl2     | -3.453920533 |
| BB313689  | 20541 Slc8a1   | -3.452686383 |
| AK019164  | 17475 Mpdz     | -3.437966567 |
| AW702161  | 11745 Anxa3    | -3.4355384   |
| BC027084  | 259300 Ehd2    | -3.43459445  |
| BC005686  | 13713 Elk3     | -3.43373535  |
| BB065799  | 240725 Sulf1   | -3.429931133 |
| NM_130449 | 140792 Colec12 | -3.424621383 |
| BB823350  | 19092 Prkg2    | -3.412943967 |
| AI642438  | 16852 Lgals1   | -3.4127125   |
| NM_007855 | 13345 Twist2   | -3.412527233 |
| BB787292  | 14302 Frk      | -3.411315533 |

|           |                 |              |
|-----------|-----------------|--------------|
| BB354684  | 217410 Trib2    | -3.410151567 |
| AF117951  | 94352 Loxl2     | -3.400751667 |
| BC025897  | 225791 Zadh2    | -3.398803383 |
| NM_019877 | 56358 Copz2     | -3.386908433 |
| AV162270  | 22240 Dpysl3    | -3.3799255   |
| D63383    | 20465 Sim2      | -3.378190883 |
| NM_008546 | 17150 Mfap2     | -3.375675317 |
| NM_008008 | 14178 Fgf7      | -3.373739283 |
| BQ174721  | 214791 Sertad4  | -3.37195165  |
| BB377873  | 121021 Cspg4    | -3.368490867 |
| BB542535  | 13036 Ctsh      | -3.3666448   |
| BC024876  | 223453 Dap      | -3.364419667 |
| L24755    | 12153 Bmp1      | -3.360524783 |
| X66083    | 12505 Cd44      | -3.354735533 |
| AW547821  | 17268 Meis1     | -3.3441435   |
| BC016447  | 26427 Creb3l1   | -3.342256433 |
| BM213516  | 20742 Spnb2     | -3.33549655  |
| BM220880  | 108655 Foxp1    | -3.326646233 |
| AK004853  | 50781 Dkk3      | -3.314331467 |
| NM_008809 | 18596 Pdgfrb    | -3.31185265  |
| AV245241  | 259300 Ehd2     | -3.304100233 |
| NM_020007 | 56758 Mbnl1     | -3.289487817 |
| BC028307  | 68792 SrpX2     | -3.28413355  |
| AA709993  | 20365 Serf1     | -3.275465433 |
| BC006737  | 12370 Casp8     | -3.272708067 |
| BB151715  | 23871 Ets1      | -3.271100167 |
| BI452727  | 14314 Fstl1     | -3.26508275  |
| BB003393  | 21923 Tnc       | -3.2549266   |
| BB535494  | 18003 Nedd9     | -3.2516385   |
| BB779859  | 209448 Hoxc10   | -3.2440814   |
| BI248947  | 109624 Cald1    | -3.241609283 |
| L26349    | 21937 Tnfrsf1a  | -3.2395265   |
| BC012674  | 19285 Ptrf      | -3.228721367 |
| U30244    | 13642 Efnb2     | -3.225253617 |
| AK004598  | 71703 Armcx3    | -3.218577033 |
| BB075247  | 19266 Ptprd     | -3.217064717 |
| BB766878  | 107581 Col16a1  | -3.216479983 |
| NM_019586 | 56228 Ube2j1    | -3.216275217 |
| NM_008761 | 18301 Fxyd5     | -3.21540255  |
| M24849    | 22352 Vim       | -3.212612833 |
| BB366804  | 18230 Nxn       | -3.208821517 |
| AV031691  | 22771 Zic1      | -3.207325183 |
| AK003303  | 19266 Ptprd     | -3.1900006   |
| NM_009252 | 20716 Serpina3n | -3.1897822   |
| BM233698  | 12977 Csf1      | -3.186553767 |
| AK018666  | 50766 Crim1     | -3.184091083 |
| NM_013813 | 13823 Epb4.1l3  | -3.17559455  |

|           |                   |              |
|-----------|-------------------|--------------|
| BB097063  | 16826 Ldb2        | -3.167842717 |
| BG070361  | 18514 Pbx1        | -3.16060585  |
| NM_023564 | 70310 Plscr3      | -3.156913317 |
| BC016893  | 15414 Hoxb6       | -3.149439067 |
| BC025602  | 52377 Rcn3        | -3.143586083 |
| BE628275  | 68910 Zfp467      | -3.129177833 |
| BB751459  | 240725 Sulf1      | -3.118822083 |
| NM_023813 | 108058 Camk2d     | -3.106603767 |
| BE630020  | 19122 Prnp        | -3.099244017 |
| NM_015786 | 50708 Hist1h1c    | -3.096520833 |
| NM_010736 | 17000 Ltbr        | -3.096244717 |
| NM_008380 | 16323 Inhba       | -3.090835667 |
| AF080090  | 20350 Sema3f      | -3.086323    |
| AV220340  | 229534 Pbxip1     | -3.08320105  |
| NM_016846 | 19731 Rgl1        | -3.083172067 |
| AA510713  | 56468 Soccs5      | -3.08271985  |
| AV246759  | 21808 Tgfb2       | -3.078846817 |
| AV238718  | 233733 Galntl4    | -3.07739925  |
| BB311061  | 56876 Nelf        | -3.07710745  |
| BM231794  | 216188 Aldh1l2    | -3.071789317 |
| NM_053147 | 93893 Pcdhb22     | -3.06913275  |
| AV124445  | 17984 Ndn         | -3.067003683 |
| AI747133  | 12338 Capn6       | -3.061495833 |
| NM_009784 | 12293 Cacna2d1    | -3.0553154   |
| NM_008675 | 17965 Nbl1        | -3.054173417 |
| X58380    | 15364 Hmga2       | -3.053552917 |
| NM_009468 | 22240 Dpysl3      | -3.0489959   |
| NM_019390 | 16905 Lmna        | -3.043480833 |
| BB533903  | 50708 Hist1h1c    | -3.028666667 |
| BB250811  | 18542 Pcolce      | -3.026433    |
| BE951265  | 66180 1110036O03R | -3.02614895  |
| AW546141  | 17118 Marcks      | -3.021924833 |
| BB825801  | 13713 Elk3        | -3.021571583 |
| NM_009255 | 20720 Serpine2    | -3.02130325  |
| BF158638  | 12826 Col4a1      | -3.010500317 |
| NM_016886 | 53623 Gria3       | -3.003217433 |
| NM_009925 | 12813 Col10a1     | -3.001262167 |
| AV278675  | 244448 Triml1     | 3.01398255   |
| BG966751  | 104156 Etv5       | 3.0156244    |
| X67668    | 97165 Hmgb2       | 3.020431667  |
| BB089717  | 12449 Ccnf        | 3.022975367  |
| BB292220  | 58180 Hic2        | 3.025155533  |
| BG069191  | 50927 Nasp        | 3.027539567  |
| BG066754  | 67204 Eif2s2      | 3.0295477    |
| AK019115  | 68239 Krt42       | 3.03983065   |
| AU015121  | 268697 Ccnb1      | 3.042294933  |
| NM_008566 | 17218 Mcm5        | 3.058338333  |

|           |                    |             |
|-----------|--------------------|-------------|
| NM_019812 | 93759 Sirt1        | 3.064211417 |
| NM_020599 | 19771 Rlbp1        | 3.06822615  |
| AV280841  | 219132 D14Ertd668e | 3.078624667 |
| BB493242  | 50927 Nasp         | 3.081964833 |
| NM_022409 | 63872 Zfp296       | 3.082454667 |
| NM_013873 | 29859 Sult4a1      | 3.0839579   |
| AF302127  | 72388 Ripk4        | 3.086288367 |
| NM_011597 | 21873 Tjp2         | 3.087218833 |
| BF578266  | 227327 B3gnt7      | 3.0910465   |
| A1195532  | 216456 Glc2        | 3.091450267 |
| BE650359  | 13619 Phc1         | 3.103443667 |
| BM247863  | 56380 Arid3b       | 3.10414725  |
| BM935811  | 16403 Itga6        | 3.109543333 |
| BG071670  | 75796 Cdyl2        | 3.110318667 |
| BC006704  | 226419 Dyrk3       | 3.114882817 |
| NM_008628 | 17685 Msh2         | 3.118807583 |
| BM196098  | 14562 Gdf3         | 3.129241967 |
| NM_020567 | 57441 Gmnn         | 3.129819017 |
| AK011289  | 66953 Cdca7        | 3.133227817 |
| NM_009426 | 22044 Trh          | 3.133924383 |
| BB367422  | 239759 Liph        | 3.1340973   |
| BC011474  | 16818 Lck          | 3.140572717 |
| NM_011176 | 19143 St14         | 3.14224885  |
| BB667216  | 22371 Vwf          | 3.143579333 |
| BI739053  | 12725 Clcn3        | 3.159571817 |
| NM_011487 | 20849 Stat4        | 3.169867333 |
| BQ177140  | 218038 Amph        | 3.17188915  |
| NM_008452 | 16598 Klf2         | 3.1728325   |
| AF329833  | 66790 Grtp1        | 3.203848083 |
| BB540053  | 217653 C79407      | 3.221807417 |
| NM_007691 | 12649 Chek1        | 3.229280333 |
| BC016095  | 228421 Kif18a      | 3.231334583 |
| BC017621  | 223775 Pim3        | 3.23674225  |
| U42190    | 17688 Msh6         | 3.242437417 |
| NM_027288 | 110173 Manba       | 3.25011815  |
| BE951628  | 217653 C79407      | 3.269844583 |
| BB125424  | 242894 Actr3b      | 3.270038817 |
| AK010648  | 70024 Mcm10        | 3.288071933 |
| AK006509  | 75796 Cdyl2        | 3.304674333 |
| NM_010174 | 14077 Fabp3        | 3.309141333 |
| NM_053271 | 116838 Rims2       | 3.314384433 |
| BG070553  | 110957 D1Pas1      | 3.318172517 |
| NM_133664 | 16763 Lad1         | 3.323882083 |
| BQ176661  | 54484 Mkrn1        | 3.3289175   |
| AF237702  | 20425 Shmt1        | 3.331763533 |
| NM_016851 | 54139 Irf6         | 3.333859083 |
| AA543734  | 21386 Tbx3         | 3.333990817 |



|           |                    |             |
|-----------|--------------------|-------------|
| NM_010346 | 14786 Grb7         | 3.34545575  |
| BC016571  | 50799 Slc25a13     | 3.36053825  |
| AK007201  | 14536 Nr6a1        | 3.360795183 |
| NM_013514 | 13829 Epb4.9       | 3.361635267 |
| U39203    | 16331 Inpp5d       | 3.380223367 |
| AW552407  | 217837 Itpk1       | 3.380479    |
| AK011462  | 72148 2610019F03R  | 3.381959433 |
| BB397151  | 332221 Zscan10     | 3.400120667 |
| U31625    | 12189 Brca1        | 3.4060535   |
| BM225706  | 243574 Kbtbd8      | 3.415306283 |
| NM_031386 | 83560 Tex14        | 3.416736917 |
| NM_009171 | 20425 Shmt1        | 3.449195983 |
| AK011986  | 112422 2610305D13R | 3.475925817 |
| AV305746  | 231327 Ppat        | 3.479371517 |
| BI465857  | 12224 Klf5         | 3.483464667 |
| NM_021308 | 57746 Piwil2       | 3.4897425   |
| BB758095  | 21873 Tjp2         | 3.499096167 |
| NM_016964 | 50878 Stag3        | 3.503349717 |
| BG066919  | 17765 Mtf2         | 3.526635767 |
| BE986504  | 71801 Plekhf2      | 3.556072867 |
| AV277242  | 243963 Zfp473      | 3.576478483 |
| NM_011799 | 23834 Cdc6         | 3.57881495  |
| NM_026190 | 67486 Polr3g       | 3.6006572   |
| NM_010357 | 14860 Gsta4        | 3.6286395   |
| AU016127  | 67374 Jam2         | 3.629554333 |
| BM230524  | 217944 Rapgef5     | 3.6361713   |
| NM_022024 | 63986 Gmfg         | 3.640558983 |
| AK014330  | 107435 Hat1        | 3.648040833 |
| NM_008816 | 18613 Pecam1       | 3.660811183 |
| BC003329  | 54484 Mkrn1        | 3.66147285  |
| AK011596  | 22042 Tfrc         | 3.664959917 |
| BB128741  | 319801 9630033F20R | 3.701341    |
| AF037370  | 12865 Cox7a1       | 3.709307883 |
| BC006646  | 12224 Klf5         | 3.738650033 |
| AV024881  | 52609 Cbx7         | 3.776539367 |
| BB234337  | 101602 AI467606    | 3.805827767 |
| AK013117  | 76974 1190003J15Ri | 3.806894467 |
| NM_010068 | 13436 Dnmt3b       | 3.83760305  |
| NM_009886 | 12614 Celsr1       | 3.862550233 |
| BE648070  | 58180 Hic2         | 3.868284683 |
| NM_007469 | 11812 Apoc1        | 3.873187833 |
| BC018383  | 226180 Ina         | 3.88687835  |
| AB072269  | 13511 Dsg2         | 3.8942605   |
| NM_013512 | 13824 Epb4.114a    | 3.902842033 |
| BB473446  | 239157 Pnma2       | 3.946305617 |
| AK010391  | 71988 Esco2        | 3.965438167 |
| BC020144  | 13511 Dsg2         | 3.9713275   |

|           |                    |             |
|-----------|--------------------|-------------|
| AK009960  | 69697 2310057J16Ri | 3.9715563   |
| AF285580  | 77485 Stk31        | 3.971668    |
| NM_007397 | 11481 Acvr2b       | 3.974705033 |
| BC003778  | 21420 Tcfap2c      | 4.010026117 |
| NM_011934 | 26380 Esrrb        | 4.057861333 |
| NM_016907 | 20732 Spint1       | 4.058743833 |
| BC004654  | 19725 Rfx2         | 4.076663867 |
| AV060866  | 18778 Pla2g1b      | 4.077706683 |
| BE133749  | 54484 Mkrrn1       | 4.082165    |
| AF425084  | 97848 Serpinb6c    | 4.1037625   |
| AV213552  | 24074 Taf7         | 4.123073    |
| BQ175337  | 72685 Dnajc6       | 4.13664     |
| AF104416  | 11828 Aqp3         | 4.179715783 |
| BM210256  | 14106 Foxh1        | 4.211211117 |
| NM_023844 | 67374 Jam2         | 4.2200985   |
| AK019319  | 11816 Apoe         | 4.313206417 |
| NM_031383 | 83557 Lin28        | 4.338394817 |
| BG084230  | 66824 Pycard       | 4.33866605  |
| AK010826  | 67374 Jam2         | 4.358034267 |
| AF330212  | 12310 Calca        | 4.358796767 |
| BQ173923  | 12808 Cobl         | 4.384203133 |
| M18775    | 17762 Mapt         | 4.42236835  |
| BC027285  | 68713 Ifitm1       | 4.4224295   |
| AK021186  | 77485 Stk31        | 4.436390117 |
| NM_009903 | 12740 Cldn4        | 4.437383    |
| NM_009749 | 12069 Bex2         | 4.45785005  |
| NM_009434 | 22113 Phlda2       | 4.474681333 |
| BC017609  | 18424 Otx2         | 4.492426433 |
| BC023498  | 72027 Slc39a4      | 4.528567183 |
| AA215046  | 67080 1700019D03R  | 4.535403217 |
| BC004037  | 22256 Ung          | 4.580378817 |
| NM_007515 | 11989 Slc7a3       | 4.595658    |
| BB469300  | 243574 Kbtbd8      | 4.605572983 |
| NM_016754 | 17907 Mylpf        | 4.613079    |
| AV277440  | 18020 Nfatc2ip     | 4.6769755   |
| BI556771  | 76974 1190003J15Ri | 4.717042917 |
| BB559861  | 60510 Syt9         | 4.853818083 |
| BB218107  | 16792 Laptm5       | 4.885893    |
| NM_030676 | 26424 Nr5a2        | 5.081557    |
| NM_008108 | 14562 Gdf3         | 5.14758275  |
| NM_133982 | 102614 Rpp25       | 5.190646483 |
| BG245669  | 14275 Folr1        | 5.20975025  |
| NM_008652 | 17865 Mybl2        | 5.210572917 |
| AV095095  | 17865 Mybl2        | 5.318561367 |
| NM_009482 | 22286 Utf1         | 5.421930317 |
| AK006110  | 67080 1700019D03R  | 5.43684025  |
| C79957    | 13511 Dsg2         | 5.656151683 |

|           |                    |             |
|-----------|--------------------|-------------|
| BB739342  | 58198 Sall1        | 5.673027467 |
| BB414515  | 20527 Slc2a3       | 5.699811883 |
| BG092030  | 13511 Dsg2         | 6.010094817 |
| BG064756  | 99377 Sall4        | 6.034042167 |
| BC006054  | 103551 E130012A19R | 6.06322625  |
| AF220524  | 54427 Dnmt3l       | 6.105105033 |
| NM_009477 | 22271 Upp1         | 6.128136833 |
| BB067210  | 73693 Dppa4        | 6.187330683 |
| M75135    | 20527 Slc2a3       | 6.2282474   |
| X69698    | 20527 Slc2a3       | 6.23042505  |
| AV029604  | 22773 Zic3         | 6.296894567 |
| NM_021480 | 58865 Tdh          | 6.529936483 |
| AF176530  | 50764 Fbxo15       | 6.66547415  |
| AK005720  | 71827 Lrrc34       | 6.691872117 |
| BB550860  | 21420 Tcfap2c      | 6.771666083 |
| AK010400  | 406217 Bex4        | 6.816883167 |
| AV212609  | 353283 Eras        | 6.834029183 |
| AV298358  | 381269 Mreg        | 6.872264583 |
| NM_009337 | 21432 Tcl1         | 6.879203683 |
| BB732077  | 22773 Zic3         | 6.953696833 |
| AV099404  | 245128 AU018091    | 7.054458833 |
| U31967    | 20674 Sox2         | 7.296394917 |
| BB709552  | 14175 Fgf4         | 7.45980965  |
| AV333667  | 26380 Esrrb        | 7.469081817 |
| NM_007430 | 11614 Nr0b1        | 7.59146485  |
| BB041571  | 381591 L1td1       | 7.663746183 |
| NM_009556 | 22702 Zfp42        | 7.9192687   |
| NM_009864 | 12550 Cdh1         | 7.9907572   |
| NM_013633 | 18999 Pou5f1       | 8.090839917 |
| AK010332  | 71950 Nanog        | 8.503540967 |
| AV294613  | 21667 TdGF1        | 8.80162735  |

Table S4 Top 20 important miRNAs in stem cells

mmu-miR-290  
mmu-miR-293  
mmu-miR-291a-3p  
mmu-miR-292-5p  
mmu-miR-295  
mmu-miR-294  
mmu-miR-291a-5p  
mmu-miR-291b-5p  
mmu-miR-302b  
mmu-miR-124a  
mmu-miR-182  
mmu-miR-200a  
mmu-miR-20b  
mmu-miR-302d  
mmu-miR-106a  
mmu-miR-183  
mmu-miR-135b  
mmu-miR-690  
mmu-miR-142-3p  
mmu-miR-302
